# Supplementary material for: The 20th anniversary of EMBnet: 20 years of bioinformatics for the Life Sciences community
Source: PubMed Central journal article supplement (PMC2697632; doi:10.1186/1471-2105-10-s6-s1), 2009-06-16
Supplement: 1471-2105-10-S6-S1-S1.pdf [file 1471-2105-10-S6-S1-S1.pdf]

| Name | Surname             | Affiliation     |                                                                                                                                                                                                                                                              |
|------|---------------------|-----------------|--------------------------------------------------------------------------------------------------------------------------------------------------------------------------------------------------------------------------------------------------------------|
| 1    | Teresa              | Attwood         | Faculty of Life Sciences, Manchester University, Manchester, United Kingdom                                                                                                                                                                                  |
| 2    | Emiliano            | Barreto         | Bioinformatics Center, Biotechnology Institute, National University of Colombia, Bogotá, Colombia                                                                                                                                                            |
| 3    | Endre               | Barta           | Bioinformatics Group, Agricultural Biotechnology Center, Gödöllo, Hungary                                                                                                                                                                                    |
| 4    | Erik                | Bongcam-Rudloff | Department of Animal Breeding and Genetics, Swedish University of Agricultural Sciences, Biomedical centre, Uppsala, Sweden                                                                                                                                  |
| 5    | Shahid              | Chohan          | Dept. of Biosciences, COMSATS Institute of Information Technology, Islamabad, Pakistan                                                                                                                                                                       |
| 6    | Domenica            | D'Elia          | Institute for Biomedical Technologies, CNR, Bari, Italy                                                                                                                                                                                                      |
| 7    | Laurent             | Falquet         | Swiss Institute of Bioinformatics, Lausanne, Switzerland                                                                                                                                                                                                     |
| 8    | Pedro               | Fernandes       | Instituto Gulbenkian de Ciencia, Centro Portugues de Bioinformatica, Oeiras, Portugal                                                                                                                                                                        |
| 9    | Andreas             | Gisel           | Institute for Biomedical Technologies, CNR, Bari, Italy                                                                                                                                                                                                      |
| 10   | Mehرداد             | Hajibabaei      | Canadian Centre for BNA Barcoding, Biodiversity Institute of Ontario, University of Guelph, Guelph, Canada                                                                                                                                                   |
| 11   | Jagger              | Harvey          | Biosciences eastern and central Africa (BeCA) Hub, Plant Biosciences Research Scientist, Nairobi, KENYA                                                                                                                                                      |
| 12   | Sophia              | Kossida         | Academy of Athens, Biomedical Research Foundation, Athens, Greece                                                                                                                                                                                            |
| 13   | Jack A.M.           | Leunissen       | Netherlands Bioinformatics Centre, NBIC,Nijmegen, The Netherlands                                                                                                                                                                                            |
| 14   | Jingchu             | Luo             | College of Life Sciences, Peking University, Beijing, China                                                                                                                                                                                                  |
| 15   | George              | Magklaras       | The Biotechnology Centre of Oslo, The University of Oslo, Biotek - UiO Oslo, Norway                                                                                                                                                                          |
| 16   | Christos            | Makris          | Computer Engineering and Informatics Department, University of Patras, Patras, Greece                                                                                                                                                                        |
| 17   | Kimmo               | Mattila         | CSC — IT Center for Science Ltd., Espoo, Finland                                                                                                                                                                                                             |
| 18   | Georgios<br>Ricardo | Papachristoudis | Massachusetts Institute of Technology, Cambridge, MA, USA                                                                                                                                                                                                    |
| 19   | Bringas             | Perez           | Centro de Ingenieria Genetica y Biotecnologia,La Habana, Cuba                                                                                                                                                                                                |
| 20   | Guy                 | Perriere        | Laboratoire de Biométrie et Biologie Evolutive, University of Lyon, Villeurbanne, France                                                                                                                                                                     |
| 21   | Graziano            | Pesole          | 1. Department of Biochemistry and Molecular Biology, University of Bari, Bari, Italy;<br>2. Institute for Biomedical Technologies, CNR, Bari, Italy                                                                                                          |
| 22   | Sandor              | Pongor          | International Centre for Genetic Engineering and Biotechnology, AREA Science Park,Trieste, Italy                                                                                                                                                             |
| 23   | Fotis               | Psomopoulos     | Aristotle University of Thessaloniki,Department of Electrical and Computer Engineering, Thessaloniki, Greece                                                                                                                                                 |
| 24   | Shoba               | Ranganathan     | 1. Department of Chemistry and Biomolecular Sciences and ARC Centre of Excellence in Bioinformatics, Macquarie University, Sydney, Australia;<br>2. Department of Biochemistry, Yong Loo Lin School of Medicine, National University of Singapore, Singapore |
| 25   | Cecilia             | Saccone         | 1. Dipartimento di Biochimica e Biologia Molecolare, Università di Bari, Bari, Italy;<br>2. Institute for Biomedical Tecnologies, CNR, Bari, Italy                                                                                                           |
| 26   | J. Cristian         | Salgado         | Centre for Biochemical Engineering and Biotechnology, Department of Chemical Engineering and Biotechnology, University of Chile, Santiago, RCH                                                                                                               |
| 27   | Sebastiano          | Stramaglia      | Department of Physics , University of Bari, Italy                                                                                                                                                                                                            |
| 28   | Evangelos           | Theodoridis     | Computer Engineering and Informatics Department, University of Patras, Patras, Greece                                                                                                                                                                        |
| 29   | Angelica            | Tulipano        | Institute for Biomedical Technologies, CNR, Bari, Italy                                                                                                                                                                                                      |
| 30   | Josè Ramon          | Valverde        | Scientific Computing Service, Madrid, Spain                                                                                                                                                                                                                  |
| 31   | Ana Tereza          | Vasconcelos     | Laboratório Nacional de Computação Científica,Laboratório de Bioinformática, Quitandinha Petrópolis, Rio de Janeir, Brazil                                                                                                                                   |
| 32   | Saverio             | Vicario         | Institute for Biomedical Technologies, CNR, Bari, Italy                                                                                                                                                                                                      |
| 33   | Piotr               | Zielenkiwicz    | Institute of Biochemistry and Biophysics, Polish Academy of Sciences, Warszawa, Poland                                                                                                                                                                       |
